# Supplementary material for: A Novel Method for Drug Screen to Regulate G Protein-Coupled Receptors in the Metabolic Network of Alzheimer's Disease
Source: Biomed Res Int. 2018 Feb 20;2018:5486403. doi: 10.1155/2018/5486403 (PMC5838471; doi:10.1155/2018/5486403)
Supplement: Supplementary Materials — Table S1: the first column of the table shows the GPCR family names in paper, while the second column is about the specific subtype names. The third column is the Uniprot id of each receptor. The fourth column is the selected predicted model of each receptor while the fifth column shows the model selection criterion. The sixth column of the table is agonist or antagonist of the receptor and the antagonist is marked by “(antagonist).” The seventh and eighth columns are the DrugBank id and smiles, respectively. The ninth, tenth, and eleventh columns show the second messenger, action, and effect to AD, respectively. The twelfth column is the references in paper given in PubMed id format. The thirteenth column is the binding ligands of the corresponding receptors. The fourteenth, fifteenth, and sixteenth columns are the IL-Bind score, the minimal vina affinity, and the vina affinity of the selected optimal extracellular binding site. The last column shows whether the selected optimal extracellular binding site is the same pocket with agonist or antagonist. If so, a check is marked; otherwise, a cross is marked. Table S2: dataset: 33 drugs for 22 G protein-coupled receptors in the pathway of Alzheimer's disease. Table S3: DUD-E protein-component dataset for estimating of binding score baseline. Figure S1: predicted structure model of CRHR1 and AT2R comparing with experimentally structure fragments. For CRHR1 model (left), the experimentally structure fragment 3EHU is painted in blue and located on extracellular domain marked by a blue transparent circle, while the fragment 4K5Y is painted in yellow and located on the transmembrane domain marked by a yellow transparent circle. The picture shows that the alignment of the CRHR1 model to the two fragments is good. And the RMSD of CRHR1 model aligning to 3EHU and 4K5Y is 1.16 Å and 0.66 Å, respectively, which indicates that the predicted structure model of CRHR1 is of great confidence. For AT2R model (right), there is no expe [file 5486403.f1.zip › Table S1.xlsx]

## Sheet: Sheet1
Table S1: The first colomn of the table shows the GPCR family names in paper, while the second column is about the specific subtype names. The third column is the Uniprot id of each receptor. The fourth column is the selected predicted model of each recepter while the fifth column shows the model selection criterion. The sixth column of the table is agonist or antagonist of the receptor and the a…
Receptor	subtype	Uniprot id	model	Note	agonist or antagonist	drugbank id	smiles	second messenger	action	effect to AD	reference (pubmed id)	binding ligand	Ilbind score	Minimal vina affinity (kcal/mol)	Extracellular vina affinity (kcal/mol)	same pocket with agonist or antagonist
mAChR	M1 mAchR	P11229	HGmod Model 1	by Uniprot Topology and Swiss model	Carbachol	DB00411	[Cl-].O=C(OCC[N+](C)(C)C)N	↑PLC, PKC and DAG ↑PIP2 hydrolysis	α-secretase (unconfirmed)	↑sAPP and ↓Aβ	21248787; 8226807; 1411529; 1359534;	NAI	0.7941	-10.8	NA
												TLS	0.7572	-10.8	-10.5	√
	M3 mAchR	P20309	HGmod Model 1	Fragment 2CSA (rmsd=6Å), 4U15 (Rat rmsd=0.81Å/0.68Å)	Cevimeline (AF102B)	DB00185	O1[C@H](SC[C@@]12CN3CCC2CC3)C	↑PIP2 hydrolysis	α-secretase (unconfirmed)	↓Aβ	21248787; 11117548; 11423097;	CVD	0.8779	-9.2	-8.4	√
												DGX	0.7759	-10.4	-10.2	√
												NAI	0.802	-9.6	-9.6	√
												TLS	0.7507	-11	-11	√
DOR	DOR	P41143	HGmod Model 1	Fragment 4N6H (rmsd= 0.177Å), 4EJ4 (Mouse rmsd=0.497Å/0.409Å)	DADLE	none	N[C@H](C(N[C@H](C)C(NCC(N[C@@H](CC1=CC=CC=C1)C(N[C@H](CC(C)C)C(O)=O)=O)=O)=O)=O)CC2=CC=C(O)C=C2	unknown	β- and γ-secretase	↓Aβ40 and Aβ42	21248787; 20066010;	DGX	0.8257	-10.1	-10.1	√
												TLS	0.7586	-9.7	-9.7	√
A2AR	A2AR	P29274	HGmod Model 1	Fragments 3VG9 (rmsd=0.519Å)	Caffeine (antagonist)	DB00201	CN1C=NC2=C1C(=O)N(C(=O)N2C)C	unknown	↓β-secretase ↓PS1 expression	↓Aβ40 and Aβ42	21248787; 16938404;	TLS	0.7634	-9.9	NA
					SCH 58261 (antagonist	none	c1ccccc1CCN1N=CC2=C1N=C(N)N3C2=NC(C4=CC=CO4)=N3	↑p38 MAPK		↓Aβ toxicity	21248787; 17007839; 19940169; 18191838;
β2AR	β2AR	P07550	HGmod Model 1	Fragment 2R4R (rmsd=0.7 Å)	Isoproterenol	DB01064	Oc1ccc(cc1O)C(O)CNC(C)C	unknown	γ-secretase	↑Aβ40 and Aβ42	21248787; 1711504;	CVD	0.8807	-9.9	-9.9	√
					clenbuterol	DB01407	Clc1cc(cc(Cl)c1N)C(O)CNC(C)(C)C
					ICI 118,551 (antagonist)	none	CC1=C2CCCC2=C(C=C1)OCC(C(C)NC(C)C)O			↓Amyloid plaques
CXCR2	CXCR2	P25025	HGmod Model 1	by Uniprot Topology and Swiss model	SB-225002 (antagonist)	none	none	unknown	↓γ-secretase expression	↓Aβ40 and Aβ42	21248787; 19067586;
								↑PI3K, ERK1 and ERK2	unknown	↑tau	21248787; 11777543;
PAC1R	PAC1R	P41586	HGmod Model 1	Fragment 3N94 (rmsd= 3.312)	PACAP (peptide)	none	none	↑ERK1, ERK2, PI3K and PKC (partially, independent of MAPK)	α-secretase (ADAM10)	↑sAPPα	21248787; 16401644;
5-HT2R	5-HT2AR	P28223	HGmod Model 1	by Uniprot Topology and Swiss model	Serotonin (5-HT)	none	c1cc2c(cc1O)c(c[nH]2)CCN	↑PLA2 ↑PIP2 hydrolysis	α-secretase (unconfirmed)	↑sAPP and APLP2	21248787; 8626761;	CVD	0.8823	-9.1	-9.1	√
												DGX	0.7843	-11.1	-11.1	√
												NAI	0.7737	-9.7	-9.5	√
												TLS	0.7617	-10.8	-10.2	√
	5-HT2CR	P28335	HGmod Model 2	by Uniprot Topology and Swiss model								DGX	0.7803	-9.7	NA
												NAI	0.7874	-10	-10	√
												TLS	0.7307	-9.4	-8.7	╳
5-HT4R	5-HT4R	Q13639	HGmod Model 1	by Uniprot Topology and Swiss model	Prucalopride	none	COCCCN1CCC(CC1)NC(=O)C2=CC(=C(C3=C2OCC3)N)Cl	unknown	α-secretase (unconfirmed)	↑sAPPα and ↓Aβ	21248787; 18322379;	DGX	0.7694	-9	-8.1	√
												NAI	0.7845	-9.1	-9.1	√
												TLS	0.7554	-10.6	-10.6	√
CRHR1	CRHR1	P34998	HGmod Model 1	Fragments 3EHU (rmsd=1.16Å) 4K5Y (rmsd=0.66Å )	CRH (protein hormone)	none	none	↑AC ↓NF-κB	α-secretase (unconfirmed)	↑sAPPα	21248787; 10628754;
Group II mGluR	mGluR2	Q14416	GPCR-I-TASSER Model 5	Fragments 4XAQ (rmsd= 0.843Å)	LY379268	none	C1[C@]([C@@H]2[C@H]([C@@H]2O1)C(=O)O)(C(=O)O)N	↑ERK		↑tau	21248787; 19026996;	TLS	0.7636	-9.5	-9.5	╳
					DCG-IV	none	[C@@H]1([C@@H](C1[C@@H](C(=O)O)N)C(=O)O)C(=O)O	↑AC, MAPK and PI3K ↓cAMP	α-secretase (mainly) β-secretase (transiently)	↑C83, C99 (transiently) and Aβ42	21248787; 19026996;
	mGluR3	Q14832	GPCR-I-TASSER Model 4	4XAR (rmsd=0.703Å), 2E4U (Rat rmsd=0.537Å) and by Uniprot Topology								ACR	0.7898	-9.1	-8.5	√
												NAI	0.8518	-9.6	-9.5	√
5-HT6R	5-HT6R	P50406	GPCR-I-TASSER Model 1	by Uniprot Topology and Swiss model	SB-74257 (antagonists)	none	C3CNCCN3c1cccc(c1nc4)cc4S(=O)(=O)c2ccccc2	unknown	↓GABA ↑ACh and Glu	Improved cognition and memory	21248787; 1958905; 18625457;	DGX	0.7458	-9.3	-9.3	√
												NAI	0.7773	-9.2	-8.2	√
					SAM-531 (antagonists)	none	O=S(=O)(c1c2cc(OCCCN(C)C)ccc2nn1)c4c3ccccc3ccc4					TLS	0.7798	-9.3	-9	√
SSTR	SSTR2	P30874	HGmod Model 1	by Uniprot Topology and Swiss model	Somatostatin (peptide)	none	none	unknown	↑Neprilysin	↓Aβ42	21248787; 15778722;	DGX	0.7746	-10.3	-10.3
												TLS	0.7588	-10	-10
	SSTR4	P31391	HGmod Model 1	by Uniprot Topology and Swiss model								DGX	0.7834	-9.4	-9.1
												TLS	0.749	-9.6	-9.6
AMYR	CT/CALCR	P30988	GPCR-I-TASSER Model 1	by Uniprot Topology and Swiss model	AC187 (antagonist)	none	none	↓Caspase activation (↓JNK and p38 MAPK?)		↓Aβ toxicity	21248787; 15201330;	DGX	0.7421	-11.1	-11.1
												NAI	0.7636	-9	-9
												TLS	0.7394	-10.9	-10.9
	RAMP1 (not GPCR)	O60894	3N7S	extracellular part
GPR3	GPR3	P46089	HGmod Model 1	by Uniprot Topology and Swiss model	Overexpression	none	none	unknown	γ-secretase	↑Aβ40 and Aβ42	21248787; 19213921;	DGX	0.8061	-9.2	NA
												NAI	0.8046	-9.5	NA
					Genetic ablation	none	none			↓Aβ40 and Aβ42		TLS	0.7651	-11.2	NA
AT2R	AT2R	P50052	HGmod Model 2	by Uniprot Topology and Swiss model 2G2A (Rat rmsd=4.11Å)	Aβ42 treatment	none	none	unknown	↑AT2R oligomers ↓M1 mAChR signalling	↑tau and neurodegeneration	21248787; 19074441; 19074439;	DGX	0.7349	-11.5	-8.9
												NAI	0.7915	-9.1	NA
												TLS	0.7831	-10.8	NA
CCR2	CCR2	P41597	HGmod Model 1	by Uniprot Topology and Swiss model 1KP1 (Rat rmsd=3.74Å)	Aβ42 treatment	none	none	unknown	unknown	↑CCL2	21248787; 12044988;	DGX	0.7665	-9.7	-9.3
					Genetic ablation (Tg2576)	none	none			↑Aβ40 and Aβ42	21248787; 17351623;
CX3CR1	CX3CR1	P49238	HGmod Model 1	by Uniprot Topology and Swiss model	Genetic ablation (3xTg–AD)	none	none	unknown	unknown	↓Neuronal loss	21248787; 20305648;	DGX	0.7497	-10.6	-10.3
												TLS	0.7443	-9.8	-9.8
FPRL1	FPRL1	P25090	HGmod Model 1	by Uniprot Topology and Swiss model	Aβ42 treatment	none	none	↑PLD, ERK1 and ERK2	unknown	Internalization of Aβ	21248787; 18723082;	DGX	0.7783	-10	-10
												NAI	0.7716	-9.5	NA
												TLS	0.7775	-9.6	-9.6
Group I mGluR	mGluR1	Q13255	No Model	Multi-Domain, bad rmsds with 3KS9 and 4OR2
	mGluR5	P41594	No Model	Multi-Domain, bad rmsds with 3LMK and 4OO9
GLP1R	GLP1R	P43220	No Model	Bad rmsd with 3IOL
