# Supplementary material for: A Novel Method for Drug Screen to Regulate G Protein-Coupled Receptors in the Metabolic Network of Alzheimer's Disease
Source: Biomed Res Int. 2018 Feb 20;2018:5486403. doi: 10.1155/2018/5486403 (PMC5838471; doi:10.1155/2018/5486403)
Supplement: Supplementary Materials — Table S1: the first column of the table shows the GPCR family names in paper, while the second column is about the specific subtype names. The third column is the Uniprot id of each receptor. The fourth column is the selected predicted model of each receptor while the fifth column shows the model selection criterion. The sixth column of the table is agonist or antagonist of the receptor and the antagonist is marked by “(antagonist).” The seventh and eighth columns are the DrugBank id and smiles, respectively. The ninth, tenth, and eleventh columns show the second messenger, action, and effect to AD, respectively. The twelfth column is the references in paper given in PubMed id format. The thirteenth column is the binding ligands of the corresponding receptors. The fourteenth, fifteenth, and sixteenth columns are the IL-Bind score, the minimal vina affinity, and the vina affinity of the selected optimal extracellular binding site. The last column shows whether the selected optimal extracellular binding site is the same pocket with agonist or antagonist. If so, a check is marked; otherwise, a cross is marked. Table S2: dataset: 33 drugs for 22 G protein-coupled receptors in the pathway of Alzheimer's disease. Table S3: DUD-E protein-component dataset for estimating of binding score baseline. Figure S1: predicted structure model of CRHR1 and AT2R comparing with experimentally structure fragments. For CRHR1 model (left), the experimentally structure fragment 3EHU is painted in blue and located on extracellular domain marked by a blue transparent circle, while the fragment 4K5Y is painted in yellow and located on the transmembrane domain marked by a yellow transparent circle. The picture shows that the alignment of the CRHR1 model to the two fragments is good. And the RMSD of CRHR1 model aligning to 3EHU and 4K5Y is 1.16 Å and 0.66 Å, respectively, which indicates that the predicted structure model of CRHR1 is of great confidence. For AT2R model (right), there is no expe [file 5486403.f1.zip › Table S2.xlsx]

## Sheet: Sheet1
Table S2: Dataset:33 drugs for 22 G protein-coupled receptors in the pathway of Alzheimer’s disease. “ * ” means drugs which are designed for GPCR target. Target of 377 is D2 dopamine receptor (P14416). Targets of CVD are Beta-1 adrenergic receptor (P08588), Beta-2 adrenergic receptor (P07550), Alpha-1A adrenergic receptor (P35348), Alpha-1B adrenergic receptor (P35368), Alpha-1D adrenergic recep…						Dataset: DUD-E protein-compent data set for estimating of binding score baseline.
HET ID	ATC code	Drug Name	Drugbank ID	Type		Target	Decoys	Ligands
MIG	A10BF02	Miglitol	DB00491	Approved Drug		1B9V	DSH W9T ACK MLB HCZ FID MAL HFZ DP3	22N
GNT	N06DA04	Galantamine	DB00674	Approved Drug		1E66	MON 2XQ RA4 T87 AXT VGH ROC ECL I01 B11 1N1 IQB	CP0
E20	N06DA02	Donepezil	DB00843	Approved Drug		1MV9	AOQ	9RA
BJM	A10BH03	Saxagliptin	DB06335	Approved Drug		1SJ0	NAN	DES RAL
P1B	A10BG03	Pioglitazone	DB01132	Approved Drug		1UDT	FMN	VIA CIA
715	A10BH01	Sitagliptin	DB01261	Approved Drug		1XL2	ZIG S0G A2E MON 2KL CBO LZH CF1 HEG 9CR SRL	NVP AZZ
377*	N06DX01	Memantine	DB01043	Approved Drug		2AA2	3H1	SNL AS4 DEX
SIM	C10AA01	Simvastatin	DB00641	Approved Drug		2AM9	TBS BRU P4O BYM	SNL
CVD*	C07AG02	Carvedilol	DB01136	Approved Drug		2FSZ	PBR DCW AXX	RAL DES
BRL	A10BG02	Rosiglitazone	DB00412	Approved Drug		2GTK	FUA	P1B
HCZ	C03AA03	Hydrochlorothiazide	DB00999	Approved Drug		2HV5	MX1 B89 BSI	TOL
EAL	C09AA02	Enalapril	DB00584	Approved Drug		2HZI	TDZ BI2 G34 356	NIL 1N1 B49 BAX STI DB8
ACR	A10BF01	Acarbose	DB00284	Approved Drug		2I78	ID2 AA2 0DN BXP DGU UCN KDM FMN HFS AS4 O16	356 RAB
CGE*	B01AC04	Clopidogrel	DB00758	Approved Drug		2OF2	5YL E5S 397 CP0 382 ATJ A2E	IRE STI BAX 1N1 B49 AQ4
CHT	N02BA03	Choline	DB00122	Approved Drug		2OYU	STR	IMN CEL DIF NPX
06X	C08CA01	Amlodipine	DB00381	Approved Drug		2P2I	ERD MUL 27M 6NP	B49
TLS*	C09CA07	Telmisartan	DB00966	Approved Drug		2QD9	T98 MUL G34	BAX 1N1
356	A10BH05	Linagliptin	DB08882	Approved Drug		2RGP	G34 2BV EJ5 FS7 RU5	FMM 0WM IRE 1N1
DGX	C01AA02	Digoxin	DB00390	Approved Drug		2VT4	3EV AA2 C24 SBB 155	CVD 5FW DSM 21B SNP
225	C08CA02	Felodipine	DB01023	Approved Drug		3BKL	DBD COL WY2 EJZ LLP FPM CBQ AWH PLG CSC UBE ZZP TYT DCO CP5	X92 X93
LPA	A16AX01	Lipoic Acid	DB00166	Approved Drug		3BQD	O74 1FN	DEX SNL
117	C10AA05	Atorvastatin	DB01076	Approved Drug		3BWM	G3E FZ9 ZYQ	TCW
LF7	A10BH02	Vildagliptin	DB04876	Approved Drug		3BZ3	NAN	B49
X8Z	C09AA01	Captopril	DB01197	Approved Drug		3C4F	5CD 2BF	1N1
FUN	C03CA01	Furosemide	DB00695	Approved Drug		3CCW	RP5 T1P PD2 R5P	FBI
T22	A10BH04	Alogliptin	DB06203	Approved Drug		3D4Q	HEG TTG	1N1 BAX
THA		Tacrine	DB00382	Withdrawn		3EL8	CPB MAH 5NL LAB ERM G34 MOF CFX PH7 0GV	1N1
HUP			DB01928	Experimental		3EML	FFO I7A FD1 LAS DM5 V4Z N3T	TEP
SWF			DB02507	Experimental		3EQH	EGT ZZK CL9	B49
505			DB07129	Experimental		3G0E	H71 MRV CP0 4BM CPB E5S AV6 GL8 5Y0	STI B49 NIL BAX 1N1
NAI		NADH	DB00157	Nutraceutical		3HMM	1FM RNA DTC	1N1
PSF		Phosphatidylserine	DB00144	Nutraceutical		3KBA	TBS	SNL MOF
VIV		Vitamin E	DB00163	Nutraceutical		3KL6	INN DRN AT4 SL0 20E BLS H71 ITC ITC RUT XTC DM1 PD1 SRA EVP I7C MIY OBN	GG2
						3KRJ	SL0 711 B11 H71	1N1 STI BAX
						3LAN	THF CRM 1YJ HRO TDZ 20V TDC AD0 C2F MX1 THG H2A C04	EFZ NVP 3TC AZZ SPP
						3LN1	36V NXY 1CA F3F JN5 A80 PNU	MXM NPX DIF FLR IBP
								NIM IMN
						3LPB	NAN	B49
						3LQ8	C85 SL0 SL0 AL6 HCZ	VHS
						3NXO	W9T OAN BD2 HUP XTG 696 TGT MUS ASV 3B3 4AM CE3 IP1 MFB BHN PMG UBA AT1 HEN CGT CSC SL0 SL0 QUE STL OGN 38O XEG CRM CRM 5PA 364	MTX
						3NXU	EJ4 9DA 4BM BD2	X89 CL6
						3NY8	CDO 5YL 0WM 06X ATA NTU DRN	SNP DSM 21B
						3ODU	ZAT	AZZ
						3PBL	R71 0H7 R17 ECL	LDP
