# Supplementary material for: A Novel Method for Drug Screen to Regulate G Protein-Coupled Receptors in the Metabolic Network of Alzheimer's Disease
Source: Biomed Res Int. 2018 Feb 20;2018:5486403. doi: 10.1155/2018/5486403 (PMC5838471; doi:10.1155/2018/5486403)
Supplement: Supplementary Materials — Table S1: the first column of the table shows the GPCR family names in paper, while the second column is about the specific subtype names. The third column is the Uniprot id of each receptor. The fourth column is the selected predicted model of each receptor while the fifth column shows the model selection criterion. The sixth column of the table is agonist or antagonist of the receptor and the antagonist is marked by “(antagonist).” The seventh and eighth columns are the DrugBank id and smiles, respectively. The ninth, tenth, and eleventh columns show the second messenger, action, and effect to AD, respectively. The twelfth column is the references in paper given in PubMed id format. The thirteenth column is the binding ligands of the corresponding receptors. The fourteenth, fifteenth, and sixteenth columns are the IL-Bind score, the minimal vina affinity, and the vina affinity of the selected optimal extracellular binding site. The last column shows whether the selected optimal extracellular binding site is the same pocket with agonist or antagonist. If so, a check is marked; otherwise, a cross is marked. Table S2: dataset: 33 drugs for 22 G protein-coupled receptors in the pathway of Alzheimer's disease. Table S3: DUD-E protein-component dataset for estimating of binding score baseline. Figure S1: predicted structure model of CRHR1 and AT2R comparing with experimentally structure fragments. For CRHR1 model (left), the experimentally structure fragment 3EHU is painted in blue and located on extracellular domain marked by a blue transparent circle, while the fragment 4K5Y is painted in yellow and located on the transmembrane domain marked by a yellow transparent circle. The picture shows that the alignment of the CRHR1 model to the two fragments is good. And the RMSD of CRHR1 model aligning to 3EHU and 4K5Y is 1.16 Å and 0.66 Å, respectively, which indicates that the predicted structure model of CRHR1 is of great confidence. For AT2R model (right), there is no expe [file 5486403.f1.zip › Table S3.xlsx]

## Sheet: Sheet1
Table S3. Dataset: DUD-E protein-compent data set for estimating of binding score baseline. "Target" means receptor protein for potential ligand, and "Ligands" means ligands that can bind to corresponding receptor, while "Decoys" means ligands that can not bind to corresponding receptor. This dataset is downloaded from DUD-E database http://dude.docking.org/
Target	Decoys	Ligands
1B9V	DSH W9T ACK MLB HCZ FID MAL HFZ DP3	22N
1E66	MON 2XQ RA4 T87 AXT VGH ROC ECL I01 B11 1N1 IQB	CP0
1MV9	AOQ	9RA
1SJ0	NAN	DES RAL
1UDT	FMN	VIA CIA
1XL2	ZIG S0G A2E MON 2KL CBO LZH CF1 HEG 9CR SRL	NVP AZZ
2AA2	3H1	SNL AS4 DEX
2AM9	TBS BRU P4O BYM	SNL
2FSZ	PBR DCW AXX	RAL DES
2GTK	FUA	P1B
2HV5	MX1 B89 BSI	TOL
2HZI	TDZ BI2 G34 356	NIL 1N1 B49 BAX STI DB8
2I78	ID2 AA2 0DN BXP DGU UCN KDM FMN HFS AS4 O16	356 RAB
2I79	ID2 AA2 0DN BXP DGU UCN KDM FMN HFS AS4 O17	357 RAB
2OYU	STR	IMN CEL DIF NPX
2P2I	ERD MUL 27M 6NP	B49
2QD9	T98 MUL G34	BAX 1N1
2RGP	G34 2BV EJ5 FS7 RU5	FMM 0WM IRE 1N1
2VT4	3EV AA2 C24 SBB 155	CVD 5FW DSM 21B SNP
3BKL	DBD COL WY2 EJZ LLP FPM CBQ AWH PLG CSC UBE ZZP TYT DCO CP5	X92 X93
3BQD	O74 1FN	DEX SNL
3BWM	G3E FZ9 ZYQ	TCW
3BZ3	NAN	B49
3C4F	5CD 2BF	1N1
3CCW	RP5 T1P PD2 R5P	FBI
3D4Q	HEG TTG	1N1 BAX
3EL8	CPB MAH 5NL LAB ERM G34 MOF CFX PH7 0GV	1N1
3EML	FFO I7A FD1 LAS DM5 V4Z N3T	TEP
3EQH	EGT ZZK CL9	B49
3G0E	H71 MRV CP0 4BM CPB E5S AV6 GL8 5Y0	STI B49 NIL BAX 1N1
3HMM	1FM RNA DTC	1N1
3KBA	TBS	SNL MOF
3KL6	INN DRN AT4 SL0 20E BLS H71 ITC ITC RUT XTC DM1 PD1 SRA EVP I7C MIY OBN	GG2
3KRJ	SL0 711 B11 H71	1N1 STI BAX
3LAN	THF CRM 1YJ HRO TDZ 20V TDC AD0 C2F MX1 THG H2A C04	EFZ NVP 3TC AZZ SPP
3LN1	36V NXY 1CA F3F JN5 A80 PNU	MXM NPX DIF FLR IBP
		NIM IMN
3LPB	NAN	B49
3LQ8	C85 SL0 SL0 AL6 HCZ	VHS
3NXO	W9T OAN BD2 HUP XTG 696 TGT MUS ASV 3B3 4AM CE3 IP1 MFB BHN PMG UBA AT1 HEN CGT CSC SL0 SL0 QUE STL OGN 38O XEG CRM CRM 5PA 364	MTX
3NXU	EJ4 9DA 4BM BD2	X89 CL6
3NY8	CDO 5YL 0WM 06X ATA NTU DRN	SNP DSM 21B
3ODU	ZAT	AZZ
3PBL	R71 0H7 R17 ECL	LDP
