# Supplementary figures and images for: A Novel Method for Drug Screen to Regulate G Protein-Coupled Receptors in the Metabolic Network of Alzheimer’s Disease
Source: Hindawi journal article supplement (doi:10.1155/2018/5486403), 2018-01-01

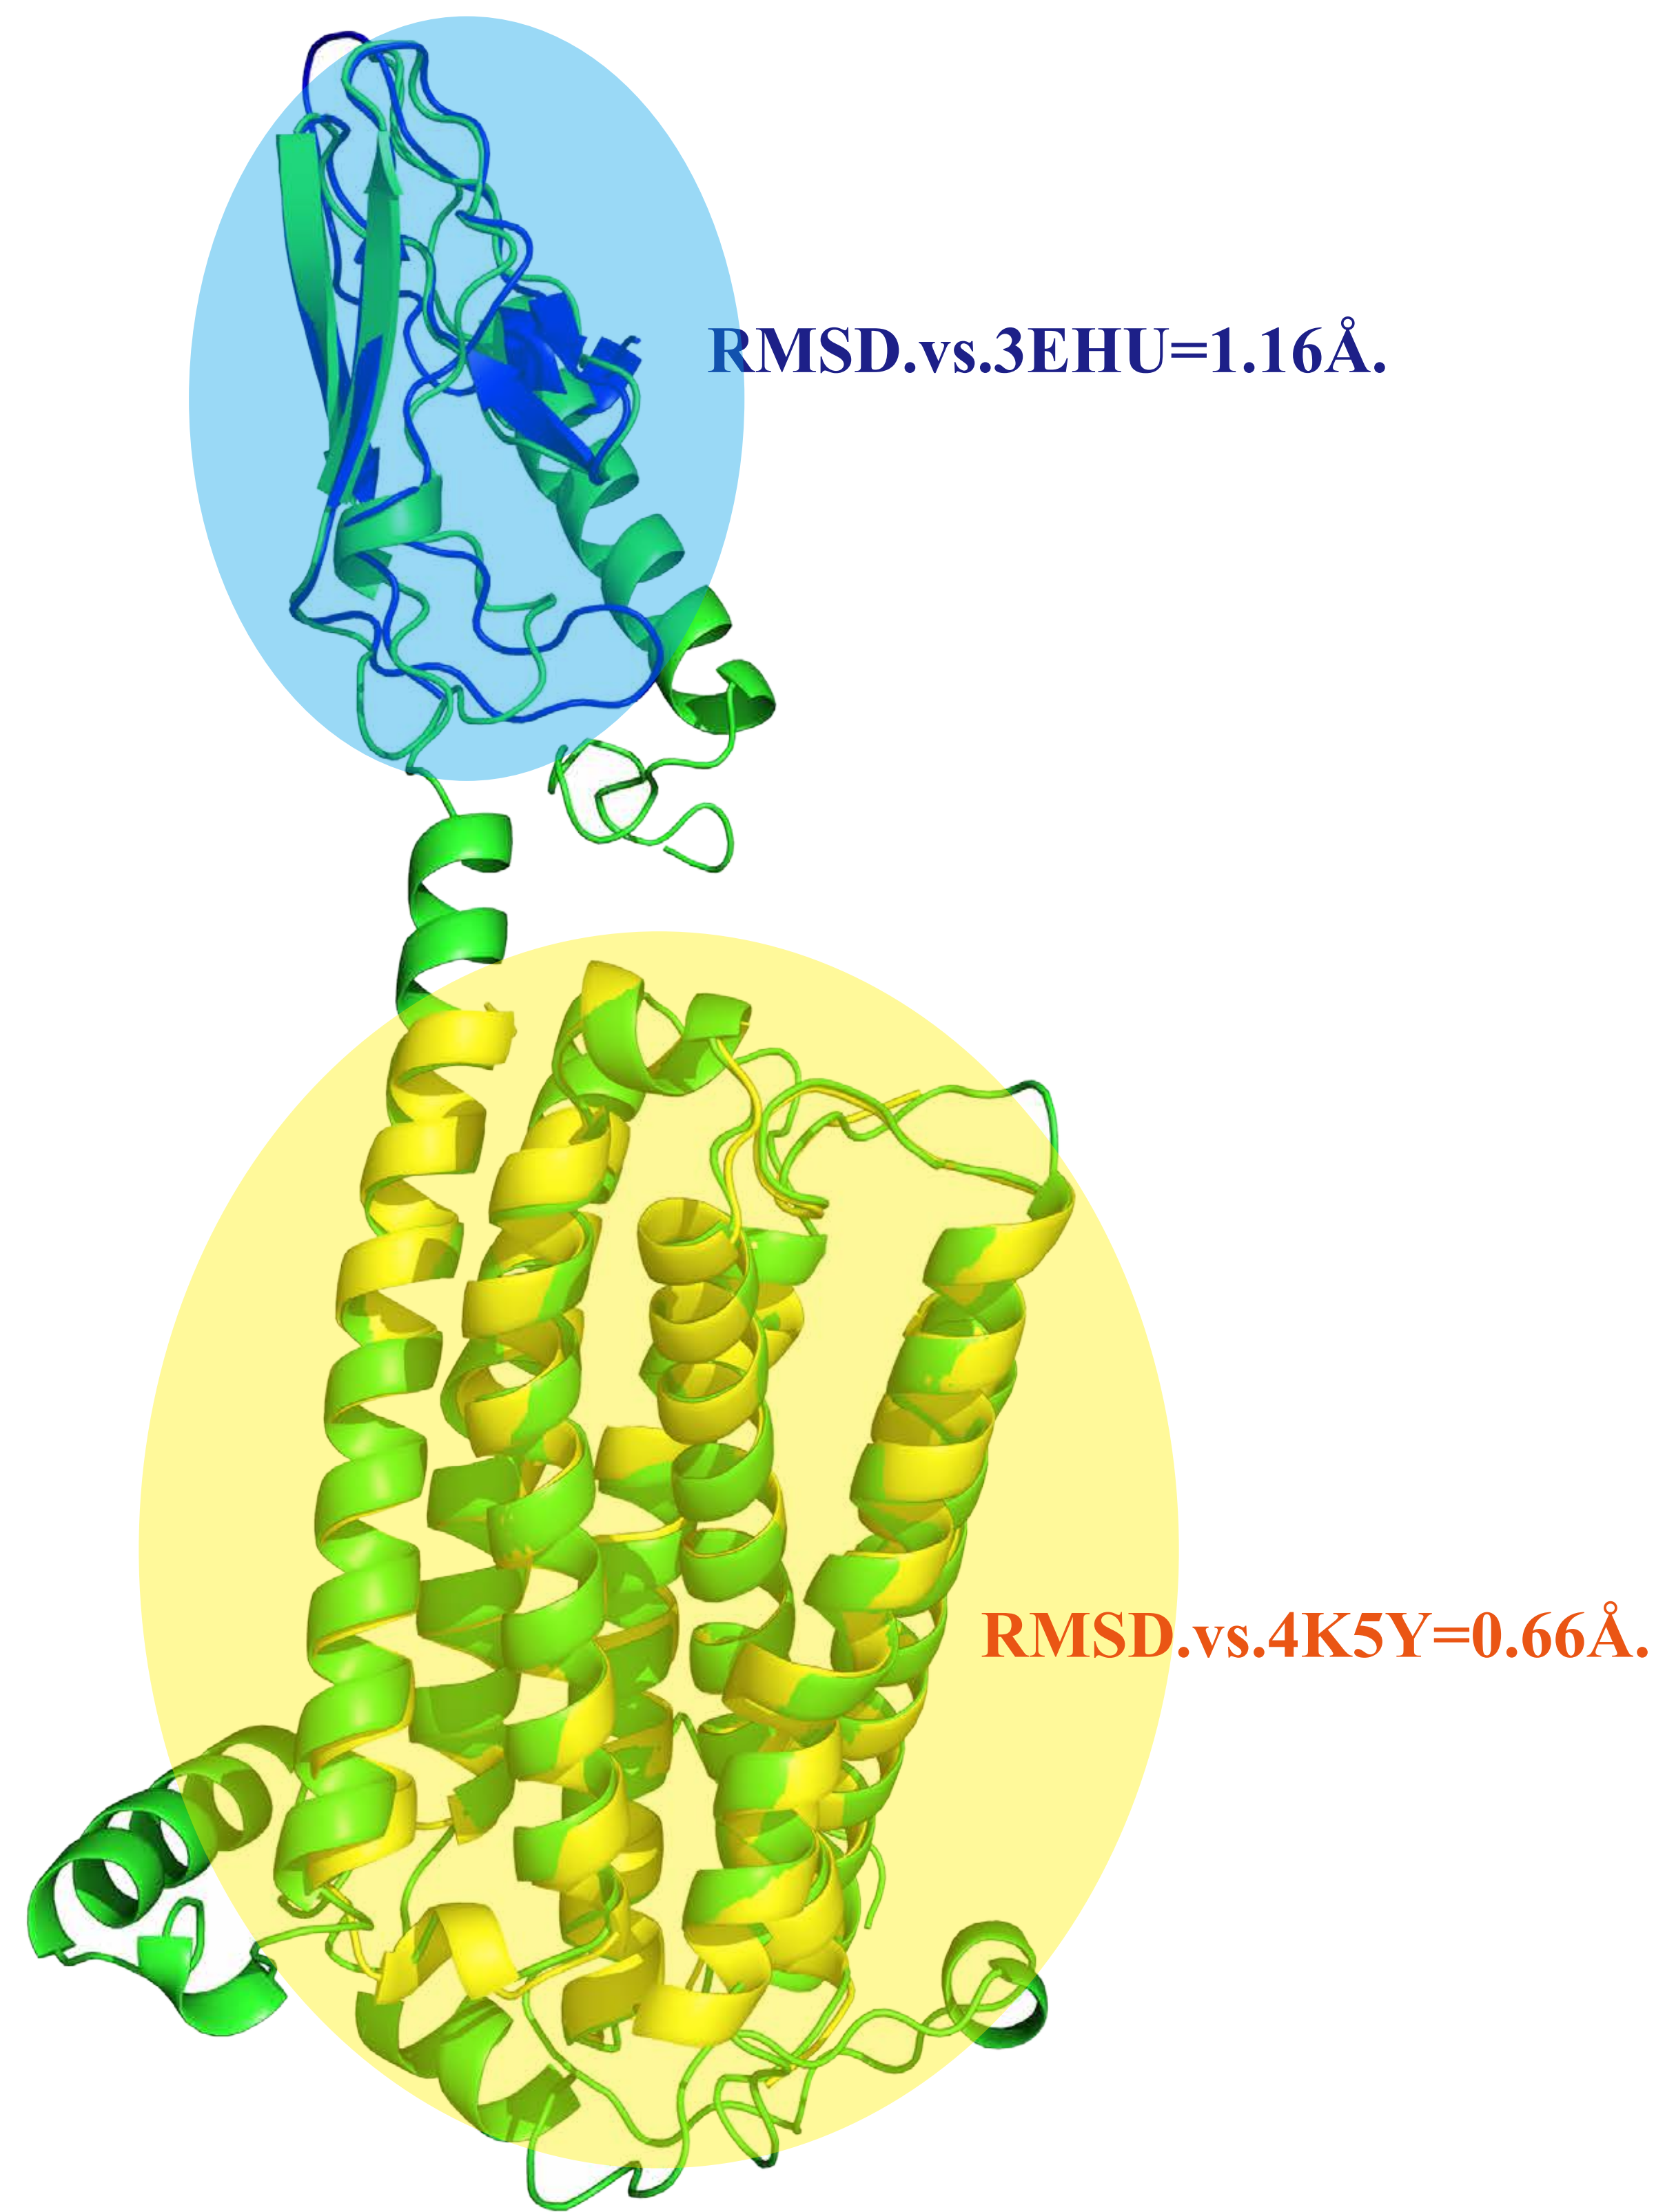

**CRHR1 Model**

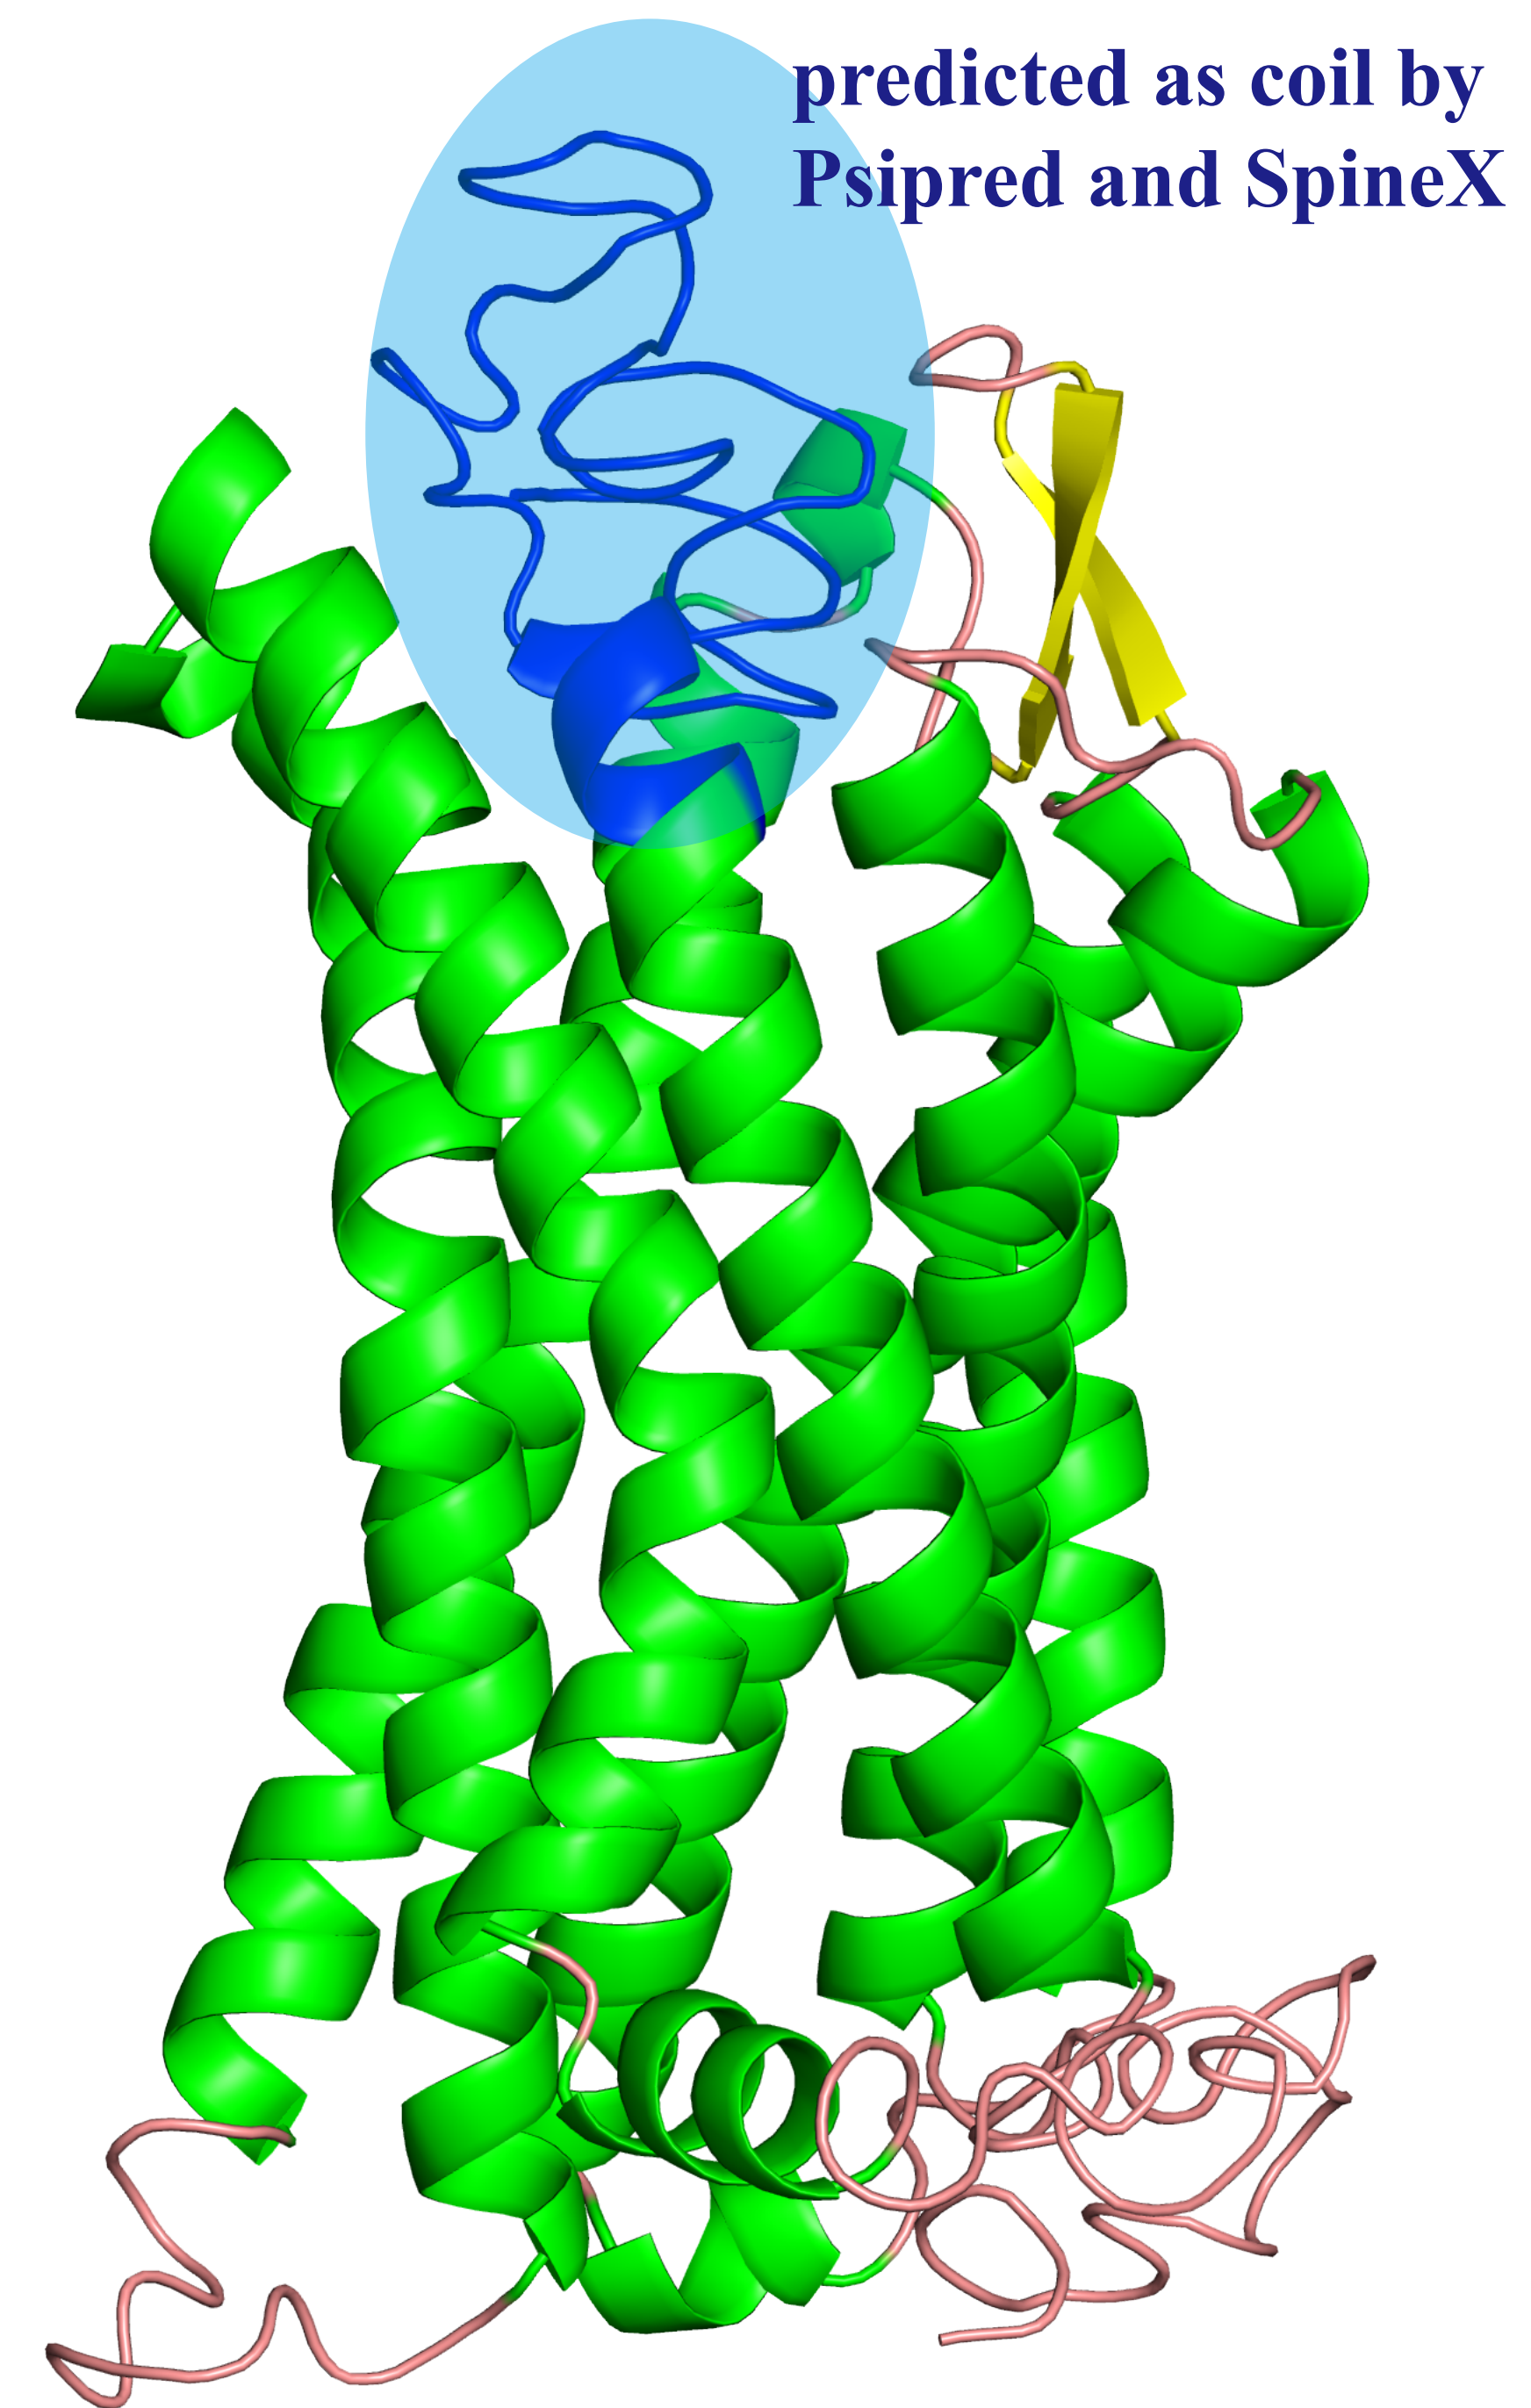

**AT2R Model**

Supplement: f1 [file 5486403.f1.zip]

**$\beta$ 2AR model**

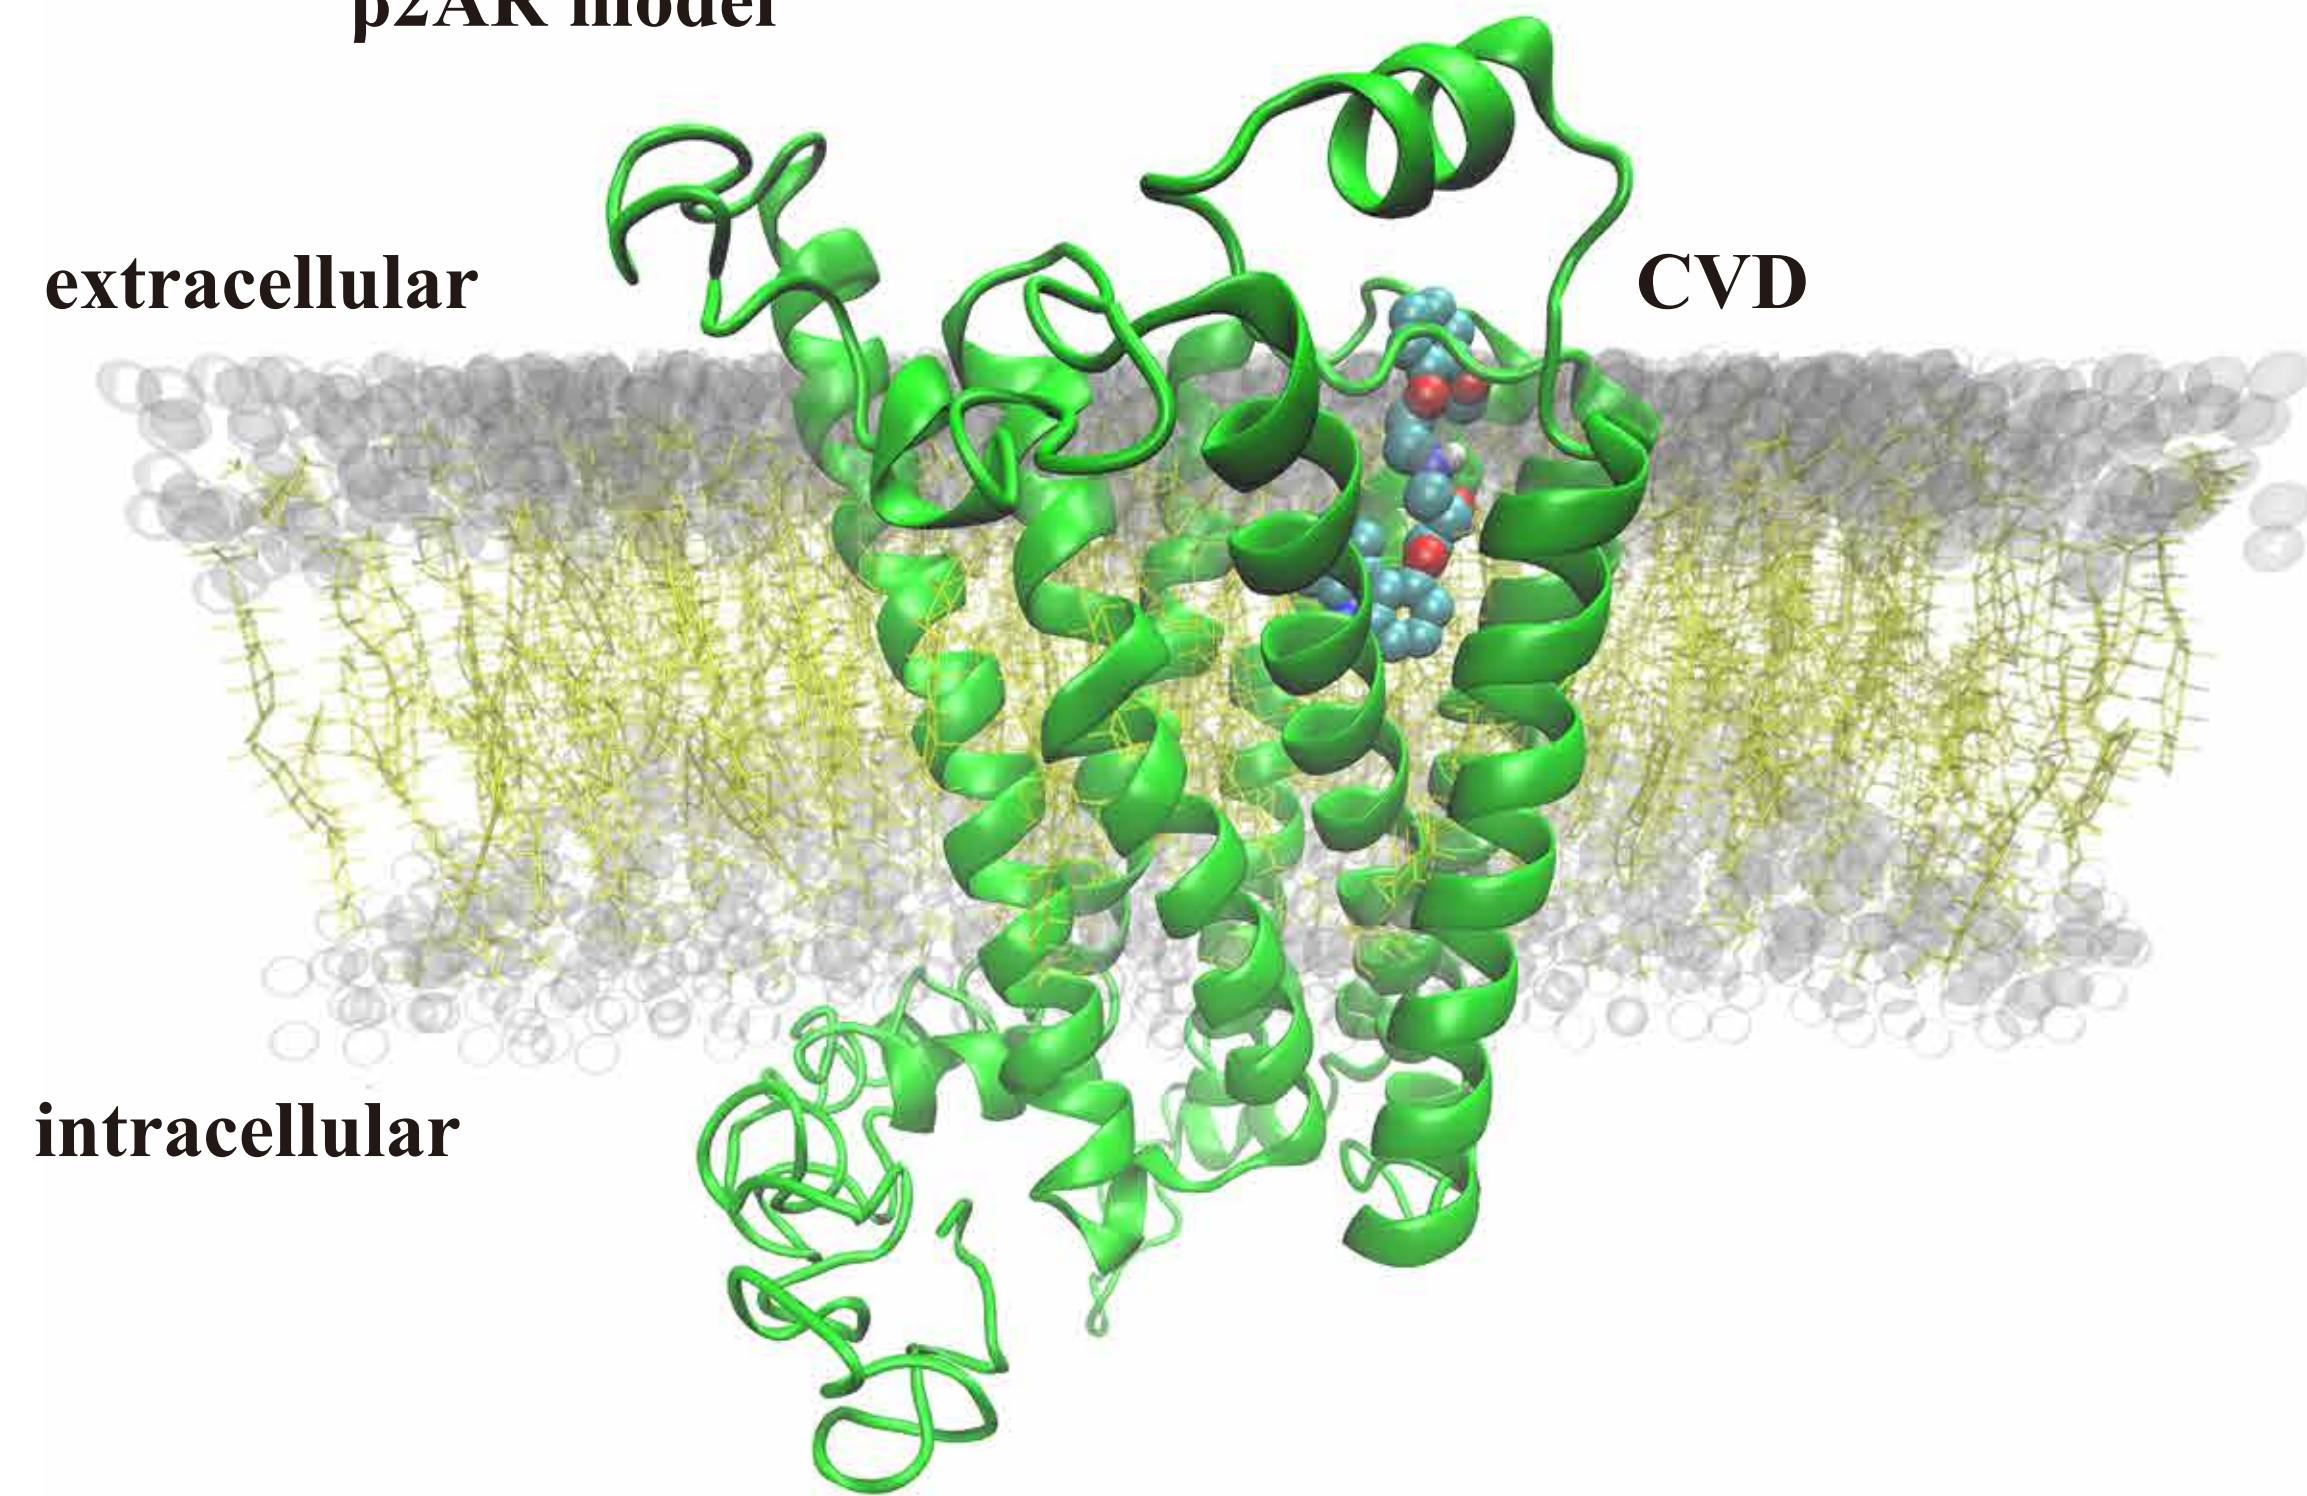

**$\beta$ 2AR 2RH1**

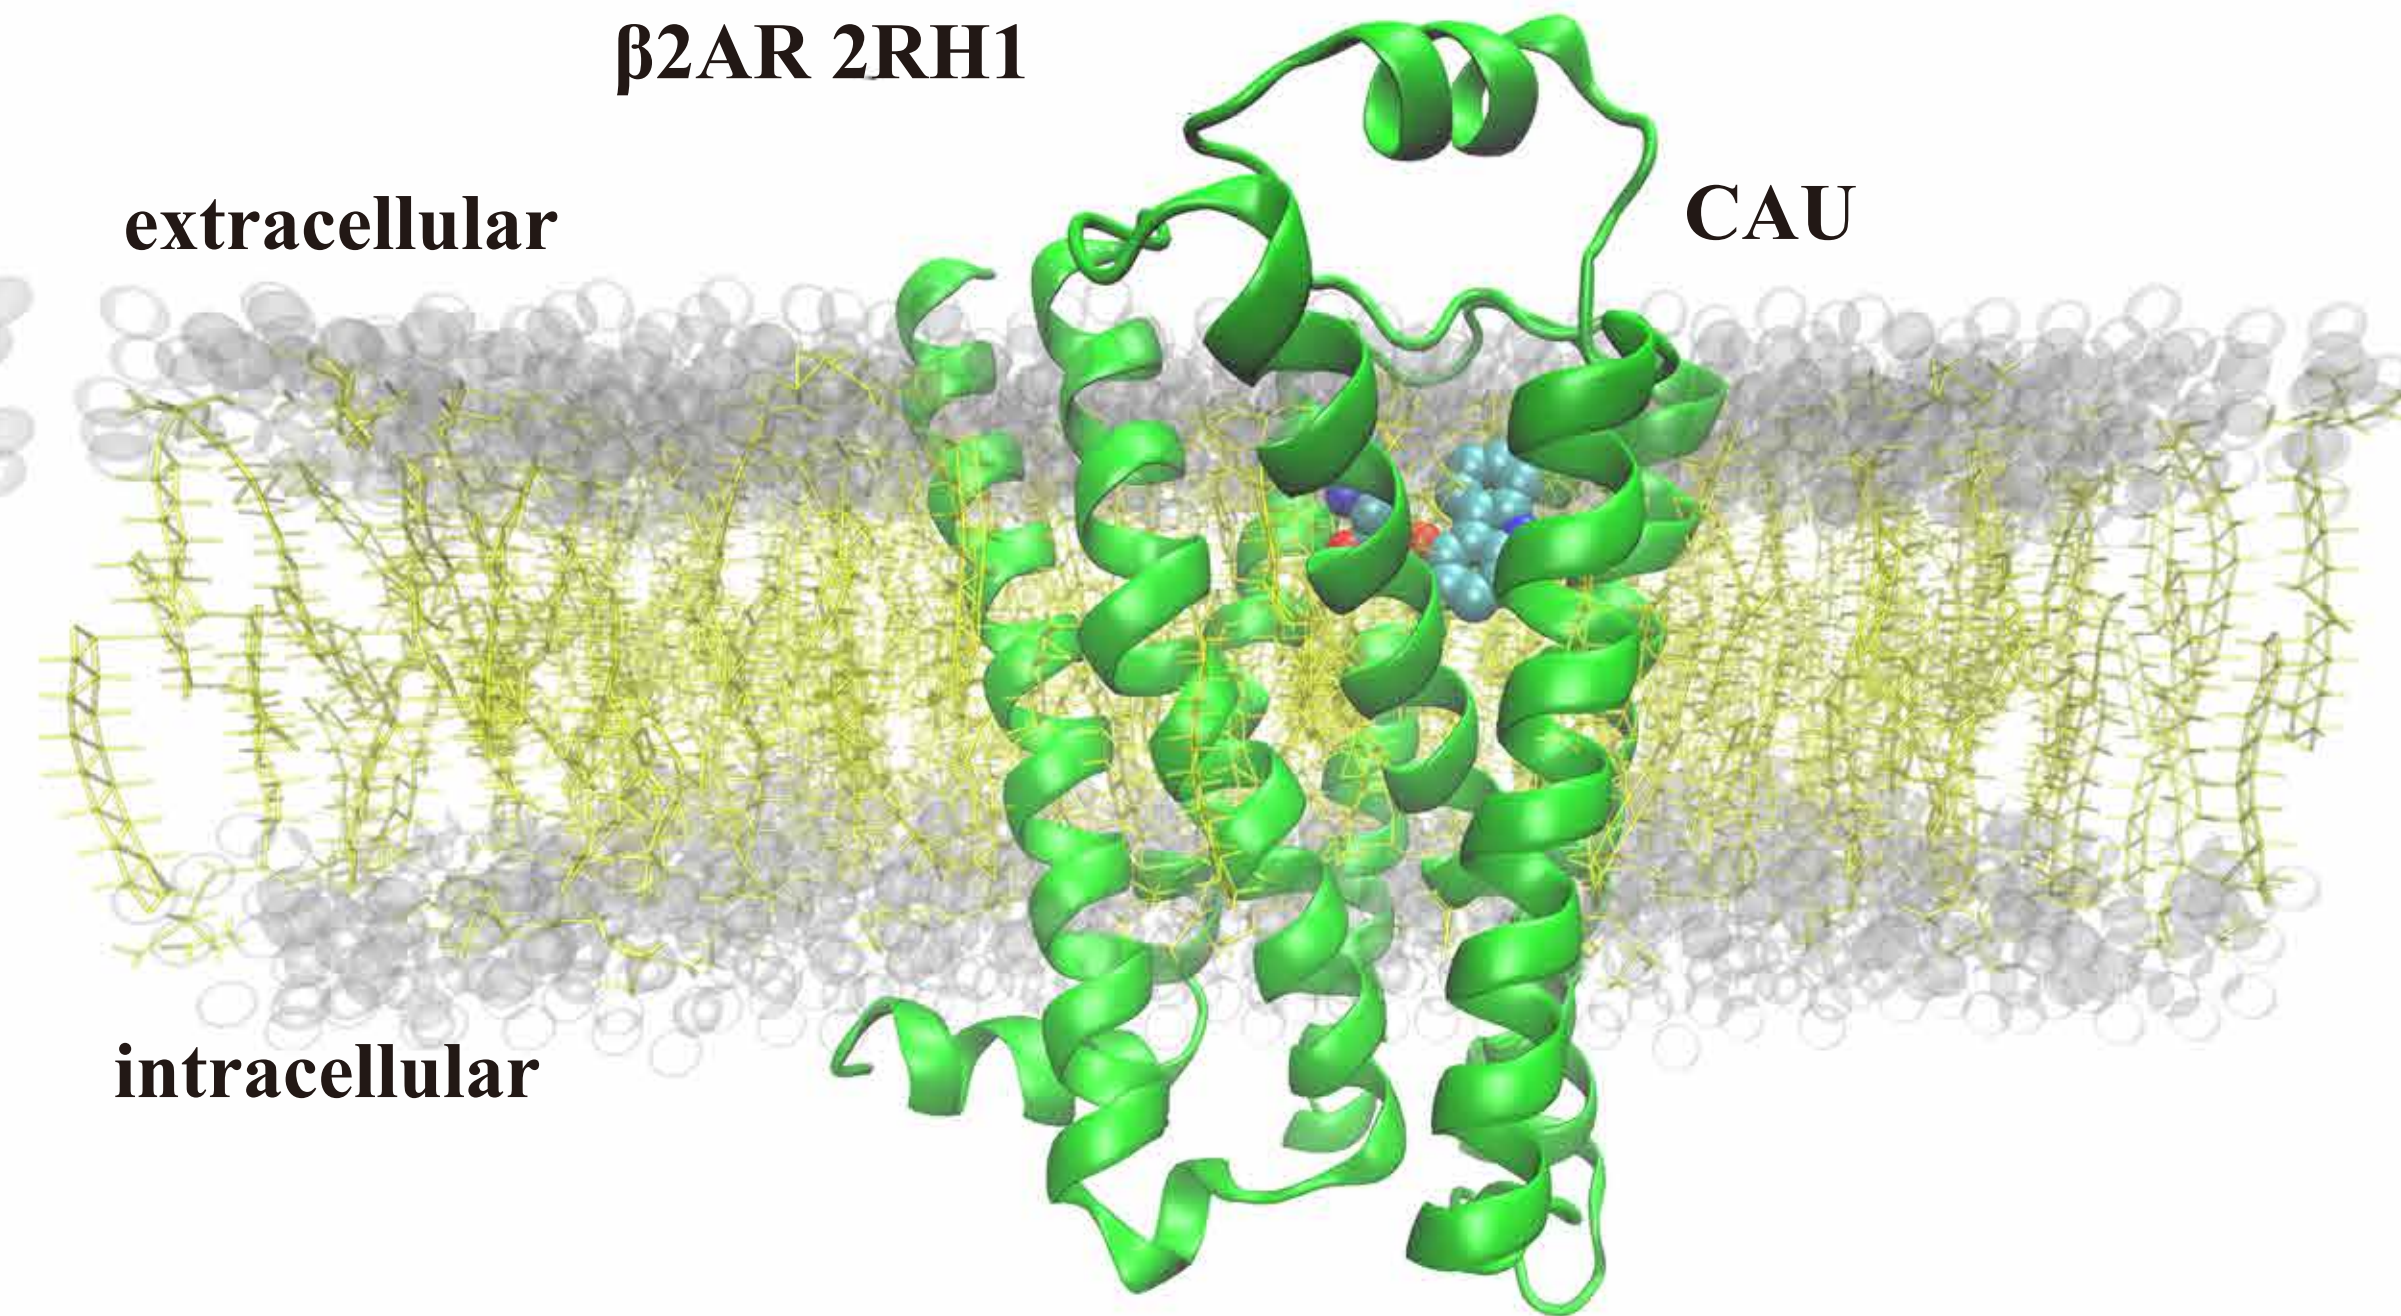

**$\beta$ 1AR 4AMJ**

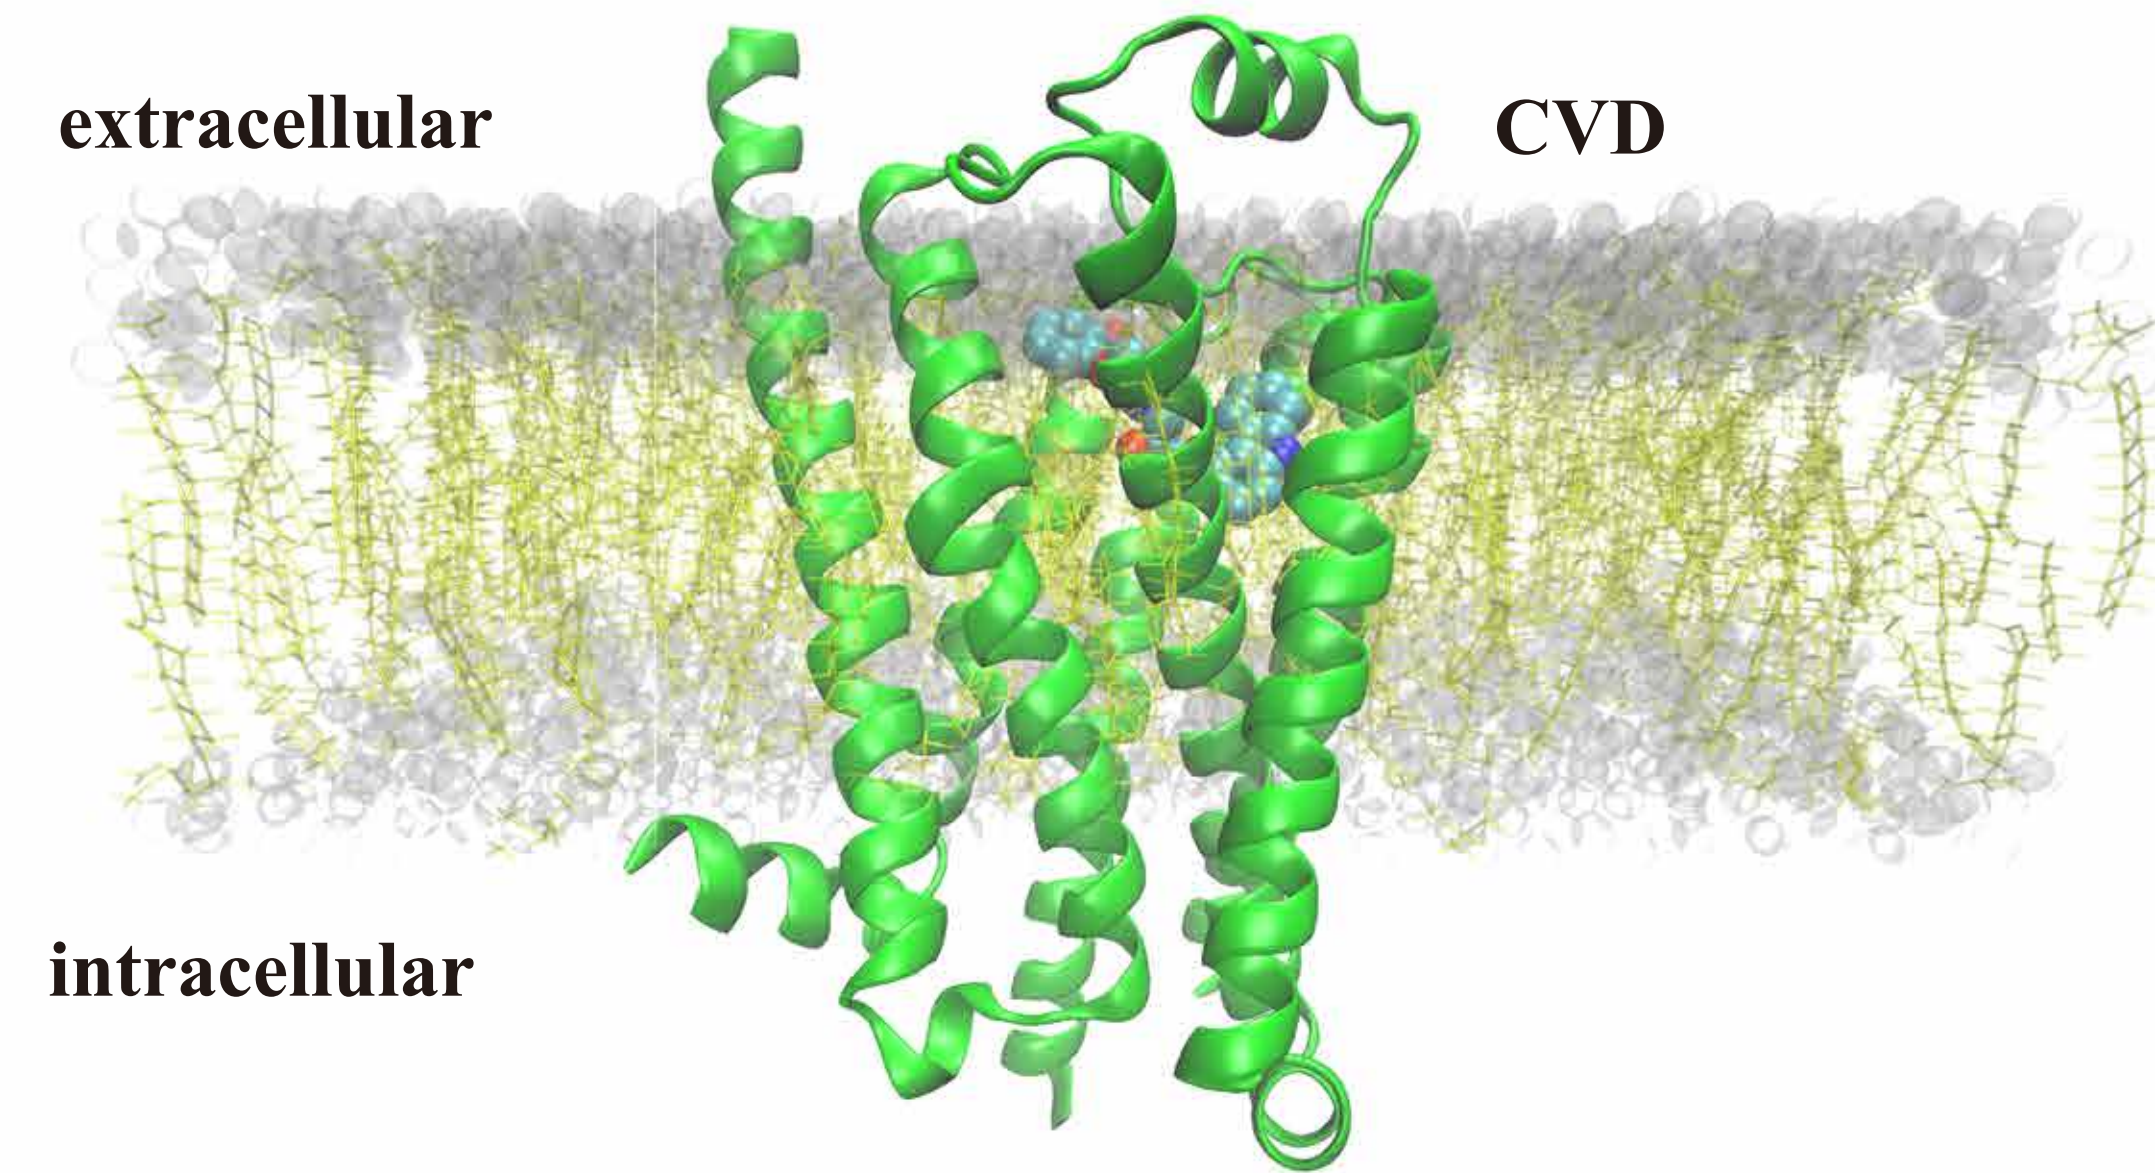

Supplement: f1 [file 5486403.f1.zip]
